# Supplementary material for: Positive regulation of meiotic DNA double-strand break formation by activation of the DNA damage checkpoint kinase Mec1(ATR)
Source: PubMed Central journal article supplement (PMC3728922; doi:10.1098/rsob.130019), 2013-07
Supplement: rsob130019-s1.pdf [file rsob130019-s1.pdf]

**Supplementary Table 1 – *S. cerevisiae* strains used in this study (in order of appearance)**

| Strain                                     | Number | Genotype                                                                                                                                                                                                                                                                                                                                     |
|--------------------------------------------|--------|----------------------------------------------------------------------------------------------------------------------------------------------------------------------------------------------------------------------------------------------------------------------------------------------------------------------------------------------|
| Wildtype                                   | M16    | ho::LYS2 <sup>+</sup> , lys2 <sup>-</sup> , ura3 <sup>+</sup> , arg4- <i>nsp</i> <sup>+</sup> , leu2::hisG <sup>+</sup> , his4X::LEU2 <sup>+</sup> , nuc1::LEU2 <sup>+</sup>                                                                                                                                                                 |
| <i>spo11-HA</i>                            | M113   | ho::LYS2 <sup>+</sup> , lys2 <sup>-</sup> , ura3 <sup>+</sup> , arg4- <i>nsp</i> <sup>+</sup> , leu2::hisG <sup>+</sup> , his4X::LEU2 <sup>+</sup> , nuc1::LEU2 <sup>+</sup> , SPO11-HA3His6::KanMX4 <sup>+</sup>                                                                                                                            |
| <i>dmc1Δ</i>                               | SG147  | ho::LYS2 <sup>+</sup> , lys2 <sup>-</sup> , ura3 <sup>+</sup> , arg4- <i>nsp</i> <sup>+</sup> , leu2::hisG <sup>+</sup> , his4X::LEU2 <sup>+</sup> , nuc1::LEU2 <sup>+</sup> , dmc1Δ::LEU2 <sup>+</sup>                                                                                                                                      |
| <i>dmc1Δ spo11-HA</i>                      | SG32   | ho::LYS2 <sup>+</sup> , lys2 <sup>-</sup> , ura3 <sup>+</sup> , arg4- <i>nsp</i> <sup>+</sup> , leu2::hisG <sup>+</sup> , his4X::LEU2 <sup>+</sup> , nuc1::LEU2 <sup>+</sup> , dmc1Δ::LEU2 <sup>+</sup> , SPO11-HA3His6::KanMX4 <sup>+</sup>                                                                                                 |
| <i>rad24A</i>                              | SG150  | ho::LYS2 <sup>+</sup> , lys2 <sup>-</sup> , ura3 <sup>+</sup> , arg4- <i>nsp</i> <sup>+</sup> , leu2::hisG <sup>+</sup> , his4X::LEU2 <sup>+</sup> , nuc1::LEU2 <sup>+</sup> , rad24A::hphMX4 <sup>+</sup>                                                                                                                                   |
| <i>rad24A spo11-HA</i>                     | SG69   | ho::LYS2 <sup>+</sup> , lys2 <sup>-</sup> , ura3 <sup>+</sup> , arg4- <i>nsp</i> <sup>+</sup> , leu2::hisG <sup>+</sup> , his4X::LEU2 <sup>+</sup> , nuc1::LEU2 <sup>+</sup> , rad24A::hphMX4 <sup>+</sup> , SPO11-HA3His6::KanMX4 <sup>+</sup>                                                                                              |
| <i>rad24A dmc1Δ</i>                        | SG146  | ho::LYS2 <sup>+</sup> , lys2 <sup>-</sup> , ura3 <sup>+</sup> , arg4- <i>nsp</i> <sup>+</sup> , leu2::hisG <sup>+</sup> , his4X::LEU2 <sup>+</sup> , nuc1::LEU2 <sup>+</sup> , dmc1Δ::LEU2 <sup>+</sup> , rad24A::hphMX4 <sup>+</sup>                                                                                                        |
| <i>rad24A dmc1Δ spo11-HA</i>               | SG29   | ho::LYS2 <sup>+</sup> , lys2 <sup>-</sup> , ura3 <sup>+</sup> , arg4- <i>nsp</i> <sup>+</sup> , leu2::hisG <sup>+</sup> , his4X::LEU2 <sup>+</sup> , nuc1::LEU2 <sup>+</sup> , dmc1Δ::LEU2 <sup>+</sup> , rad24A::hphMX4 <sup>+</sup> , SPO11-HA3His6::KanMX4 <sup>+</sup>                                                                   |
| <i>rad24A rad51Δ dmc1Δ</i>                 | SG243  | ho::hisG <sup>+</sup> , lys2 <sup>-</sup> , ura3 <sup>+</sup> , arg4- <i>nsp</i> <sup>+</sup> , leu2::hisG <sup>+</sup> , his4X::LEU2 <sup>+</sup> , nuc1::LEU2 <sup>+</sup> , dmc1Δ::LEU2 <sup>+</sup> , rad51Δ::hisG-URA3-hisG <sup>+</sup>                                                                                                |
| <i>rad24A rad51Δ dmc1Δ spo11-HA</i>        | SG242  | ho::LYS2 <sup>+</sup> , lys2 <sup>-</sup> , ura3 <sup>+</sup> , arg4- <i>nsp</i> <sup>+</sup> , leu2::hisG <sup>+</sup> , his4X::LEU2 <sup>+</sup> , nuc1::LEU2 <sup>+</sup> , dmc1Δ::LEU2 <sup>+</sup> , rad51Δ::hisG-URA3-hisG <sup>+</sup> , SPO11-HA3His6::KanMX4 <sup>+</sup>                                                           |
| <i>rad80A rad24A rad51Δ dmc1Δ spo11-HA</i> | SG406  | ho::LYS2 <sup>+</sup> , lys2 <sup>-</sup> , ura3 <sup>+</sup> , arg4- <i>nsp</i> <sup>+</sup> , leu2::hisG <sup>+</sup> , his3- <i>?</i> , his4X::LEU2 <sup>+</sup> , nuc1::LEU2 <sup>+</sup> , dmc1Δ::LEU2 <sup>+</sup> , rad51Δ::hisG-URA3-hisG <sup>+</sup> , SPO11-HA3His6::KanMX4 <sup>+</sup> , rad80A::hphMX4 <sup>+</sup>            |
| <i>sae2Δ</i>                               | M1315  | ho::LYS2 <sup>+</sup> , lys2 <sup>-</sup> , ura3 <sup>+</sup> , arg4- <i>nsp</i> <sup>+</sup> , leu2::hisG <sup>+</sup> , his4X::LEU2 <sup>+</sup> , nuc1::LEU2 <sup>+</sup> , sae2Δ::KanMX <sup>+</sup>                                                                                                                                     |
| <i>sae2Δ spo11-HA</i>                      | M110   | ho::LYS2 <sup>+</sup> , lys2 <sup>-</sup> , ura3 <sup>+</sup> , arg4- <i>nsp</i> <sup>+</sup> , leu2::hisG <sup>+</sup> , his4X::LEU2 <sup>+</sup> , nuc1::LEU2 <sup>+</sup> , sae2Δ::KanMX <sup>+</sup> , SPO11-HA3His6::KanMX4 <sup>+</sup>                                                                                                |
| <i>sae2Δ rad24A</i>                        | SG103  | ho::LYS2 <sup>+</sup> , lys2 <sup>-</sup> , ura3 <sup>+</sup> , arg4- <i>nsp</i> <sup>+</sup> , leu2::hisG <sup>+</sup> , his4X::LEU2 <sup>+</sup> , nuc1::LEU2 <sup>+</sup> , rad24A::hphMX4 <sup>+</sup> , sae2Δ::KanMX <sup>+</sup>                                                                                                       |
| <i>sae2Δ rad24A spo11-HA</i>               | SG106  | ho::LYS2 <sup>+</sup> , lys2 <sup>-</sup> , ura3 <sup>+</sup> , arg4- <i>nsp</i> <sup>+</sup> , leu2::hisG <sup>+</sup> , his4X::LEU2 <sup>+</sup> , nuc1::LEU2 <sup>+</sup> , rad24A::hphMX4 <sup>+</sup> , sae2Δ::KanMX <sup>+</sup> , SPO11-HA3His6::KanMX4 <sup>+</sup>                                                                  |
| <i>pCLB2-MEC1</i>                          | SG286  | ho::LYS2 <sup>+</sup> , lys2 <sup>-</sup> , ura3 <sup>+</sup> , arg4- <i>nsp</i> <sup>+</sup> , leu2::hisG <sup>+</sup> , his4X::LEU2 <sup>+</sup> , nuc1::LEU2 <sup>+</sup> , ade2-Bgl/ADE2, pCLB2-MEC1::KanMX <sup>+</sup>                                                                                                                 |
| <i>pCLB2-MEC1 spo11-HA</i>                 | SG261  | ho::LYS2 <sup>+</sup> , lys2 <sup>-</sup> , ura3 <sup>+</sup> , arg4- <i>nsp</i> <sup>+</sup> , leu2::hisG <sup>+</sup> , his4X::LEU2 <sup>+</sup> , nuc1::LEU2 <sup>+</sup> , ade2-Bgl/ADE2, pCLB2-MEC1::KanMX4 <sup>+</sup> , SPO11-HA3His6::KanMX4 <sup>+</sup>                                                                           |
| <i>pCLB2-MEC1 dmc1Δ</i>                    | SG283  | ho::LYS2 <sup>+</sup> , lys2 <sup>-</sup> , ura3 <sup>+</sup> , arg4- <i>nsp</i> <sup>+</sup> , leu2::hisG <sup>+</sup> , his4X::LEU2 <sup>+</sup> , nuc1::LEU2 <sup>+</sup> , pCLB2-MEC1::KanMX <sup>+</sup> , dmc1Δ::HphMX <sup>+</sup>                                                                                                    |
| <i>pCLB2-MEC1 dmc1Δ spo11-HA</i>           | SG258  | ho::LYS2 <sup>+</sup> , lys2 <sup>-</sup> , ura3 <sup>+</sup> , arg4- <i>nsp</i> <sup>+</sup> , leu2::hisG <sup>+</sup> , his4X::LEU2 <sup>+</sup> , nuc1::LEU2 <sup>+</sup> , pCLB2-MEC1::KanMX4 <sup>+</sup> , dmc1Δ::HphMX <sup>+</sup> , SPO11-HA3His6::KanMX4 <sup>+</sup>                                                              |
| <i>rad17A</i>                              | SG181  | ho::LYS2 <sup>+</sup> , lys2 <sup>-</sup> , ura3 <sup>+</sup> , arg4- <i>nsp</i> <sup>+</sup> , leu2::hisG <sup>+</sup> , his3- <i>?</i> , his4X::LEU2 <sup>+</sup> , nuc1Δ::LEU2 <sup>+</sup> , rad17A::natMX <sup>+</sup>                                                                                                                  |
| <i>rad17A spo11-HA</i>                     | SG187  | ho::LYS2 <sup>+</sup> , lys2 <sup>-</sup> , ura3 <sup>+</sup> , arg4- <i>nsp</i> <sup>+</sup> /ARG4, leu2::hisG <sup>+</sup> , his3- <i>?</i> , his4X::LEU2 <sup>+</sup> , nuc1::LEU2 <sup>+</sup> , rad17A::natMX <sup>+</sup> , SPO11-HA3His6::KanMX4 <sup>+</sup>                                                                         |
| <i>rad17A dmc1Δ</i>                        | SG177  | ho::LYS2 <sup>+</sup> , lys2 <sup>-</sup> , ura3 <sup>+</sup> , arg4- <i>nsp</i> <sup>+</sup> /ARG4, leu2::hisG <sup>+</sup> , his3- <i>?</i> , his4X::LEU2 <sup>+</sup> , nuc1::LEU2 <sup>+</sup> , rad17A::natMX <sup>+</sup> , dmc1Δ::LEU2 <sup>+</sup>                                                                                   |
| <i>rad17A dmc1Δ spo11-HA</i>               | SG180  | ho::LYS2 <sup>+</sup> , lys2 <sup>-</sup> , ura3 <sup>+</sup> , arg4- <i>nsp</i> <sup>+</sup> /ARG4, leu2::hisG <sup>+</sup> , his3- <i>?</i> , his4X::LEU2 <sup>+</sup> , nuc1::LEU2 <sup>+</sup> , rad17A::natMX <sup>+</sup> , dmc1Δ::LEU2 <sup>+</sup> , SPO11-HA3His6::KanMX4 <sup>+</sup>                                              |
| <i>dmc1Δ spo11-D290A</i>                   | M1881  | ho::LYS2 <sup>+</sup> , lys2 <sup>-</sup> , ura3 <sup>+</sup> , arg4- <i>nsp</i> <sup>+</sup> , leu2::hisG <sup>+</sup> , his4X::LEU2 <sup>+</sup> , nuc1::LEU2 <sup>+</sup> , dmc1Δ::hphMX <sup>+</sup> , spo11(D290A)::kanMX4 <sup>+</sup>                                                                                                 |
| <i>dmc1Δ rad24A spo11-D290A</i>            | M1882  | ho::LYS2 <sup>+</sup> , lys2 <sup>-</sup> , ura3 <sup>+</sup> , arg4- <i>nsp</i> <sup>+</sup> , leu2- <i>?</i> , nuc1::LEU2 <sup>+</sup> , his4BX::LEU2 <sup>+</sup> , rad24A::hphMX <sup>+</sup> , spo11(D290A)::kanMX4 <sup>+</sup>                                                                                                        |
| <i>sae2Δ spo11-D290A</i>                   | M1885  | ho::LYS2 <sup>+</sup> , lys2 <sup>-</sup> , ura3 <sup>+</sup> , arg4- <i>nsp</i> <sup>+</sup> , leu2- <i>?</i> , nuc1::LEU2 <sup>+</sup> , sae2Δ::kanMX4 <sup>+</sup> , spo11(D290A)::kanMX4 <sup>+</sup>                                                                                                                                    |
| <i>dmc1Δ rad24A pCLB2-CDC5</i>             | SG460  | ho::LYS2 <sup>+</sup> , lys2 <sup>-</sup> , ura3 <sup>+</sup> , arg4- <i>nsp</i> <sup>+</sup> , leu2::hisG <sup>+</sup> , his4X::LEU2 <sup>+</sup> , nuc1::LEU2 <sup>+</sup> , dmc1Δ::LEU2 <sup>+</sup> , rad24A::Hysg <sup>+</sup> , cdc5::pCLB2-CDC5::kanMX6 <sup>+</sup>                                                                  |
| <i>dmc1Δ rad24A pCLB2-CDC5 spo11-HA</i>    | SG454  | ho::LYS2 <sup>+</sup> , lys2 <sup>-</sup> , ura3 <sup>+</sup> , arg4- <i>nsp</i> <sup>+</sup> , leu2::hisG <sup>+</sup> , his4X::LEU2 <sup>+</sup> , nuc1::LEU2 <sup>+</sup> , dmc1Δ::LEU2 <sup>+</sup> , rad24A::Hysg <sup>+</sup> , cdc5::pCLB2-CDC5::kanMX6 <sup>+</sup> , SPO11-HA3His6::KanMX4 <sup>+</sup>                             |
| <i>spo11-D290A</i>                         | M1878  | ho::LYS2 <sup>+</sup> , lys2 <sup>-</sup> , ura3 <sup>+</sup> , arg4- <i>nsp</i> <sup>+</sup> , leu2- <i>?</i> , nuc1::LEU2 <sup>+</sup> , his4BX::LEU2 <sup>+</sup> , spo11(D290A)::kanMX4 <sup>+</sup>                                                                                                                                     |
| <i>rad24A spo11-D290A</i>                  | M1879  | ho::LYS2 <sup>+</sup> , lys2 <sup>-</sup> , ura3 <sup>+</sup> , arg4- <i>nsp</i> <sup>+</sup> , leu2- <i>?</i> , nuc1::LEU2 <sup>+</sup> , his4BX::LEU2 <sup>+</sup> , rad24A::hphMX <sup>+</sup> , spo11(D290A)::kanMX4 <sup>+</sup>                                                                                                        |
| <i>pGAL-NDT80</i>                          | M1847  | ho::LYS2 <sup>+</sup> , lys2 <sup>-</sup> , ura3 <sup>+</sup> , arg4- <i>nsp</i> <sup>+</sup> , leu2::hisG <sup>+</sup> , his4X::LEU2 <sup>+</sup> , nuc1::LEU2 <sup>+</sup> , ura3::PGPDIGAL4(848)-ER::URA3 <sup>+</sup> , pGAL-NDT80::TRP1 <sup>+</sup>                                                                                    |
| <i>pGAL-NDT80 rad24A spo11-HA</i>          | M1847  | ho::LYS2 <sup>+</sup> , lys2 <sup>-</sup> , ura3 <sup>+</sup> , arg4- <i>nsp</i> <sup>+</sup> , leu2::hisG <sup>+</sup> , his4X::LEU2 <sup>+</sup> , nuc1::LEU2 <sup>+</sup> , ura3::PGPDIGAL4(848)-ER::URA3 <sup>+</sup> , pGAL-NDT80::TRP1 <sup>+</sup> , SPO11-HA3His6::KanMX4 <sup>+</sup>                                               |
| <i>pGAL-NDT80 spo11-D290A</i>              | M1892  | ho::LYS2 <sup>+</sup> , lys2 <sup>-</sup> , ura3 <sup>+</sup> , arg4- <i>nsp</i> <sup>+</sup> , leu2::hisG <sup>+</sup> , his4X::LEU2 <sup>+</sup> , nuc1::LEU2 <sup>+</sup> , ura3::PGPDIGAL4(848)-ER::URA3 <sup>+</sup> , PGALINDT80::TRP1 <sup>+</sup> , spo11(D290A)::kanMX <sup>+</sup>                                                 |
| <i>pGAL-NDT80 rad24A</i>                   | M1848  | ho::LYS2 <sup>+</sup> , lys2 <sup>-</sup> , ura3 <sup>+</sup> , arg4- <i>nsp</i> <sup>+</sup> , leu2::hisG <sup>+</sup> , his4X::LEU2 <sup>+</sup> , nuc1::LEU2 <sup>+</sup> , ura3::PGPDIGAL4(848)-ER::URA3 <sup>+</sup> , pGAL-NDT80::TRP1 <sup>+</sup> , rad24A::hphMX <sup>+</sup>                                                       |
| <i>pGAL-NDT80 rad24A spo11-HA</i>          | M1850  | ho::LYS2 <sup>+</sup> , lys2 <sup>-</sup> , ura3 <sup>+</sup> , arg4- <i>nsp</i> <sup>+</sup> , leu2::hisG <sup>+</sup> , his4X::LEU2 <sup>+</sup> , nuc1::LEU2 <sup>+</sup> , ura3::PGPDIGAL4(848)-ER::URA3 <sup>+</sup> , pGAL-NDT80::TRP1 <sup>+</sup> , rad24A::hphMX <sup>+</sup> , SPO11-HA3His6::KanMX4 <sup>+</sup>                  |
| <i>pGAL-NDT80 rad24A spo11-D290A</i>       | M1913  | ho::LYS2 <sup>+</sup> , lys2 <sup>-</sup> , ura3 <sup>+</sup> , arg4- <i>nsp</i> <sup>+</sup> , leu2- <i>?</i> , trp1::hisG <sup>+</sup> , his4BX::LEU2 <sup>+</sup> , nuc1::LEU2 <sup>+</sup> , ura3::PGPDIGAL4(848)-ER::URA3 <sup>+</sup> , pGAL-NDT80::TRP1 <sup>+</sup> , rad24A::hphMX <sup>+</sup> , spo11(D290A)::kanMX4 <sup>+</sup> |

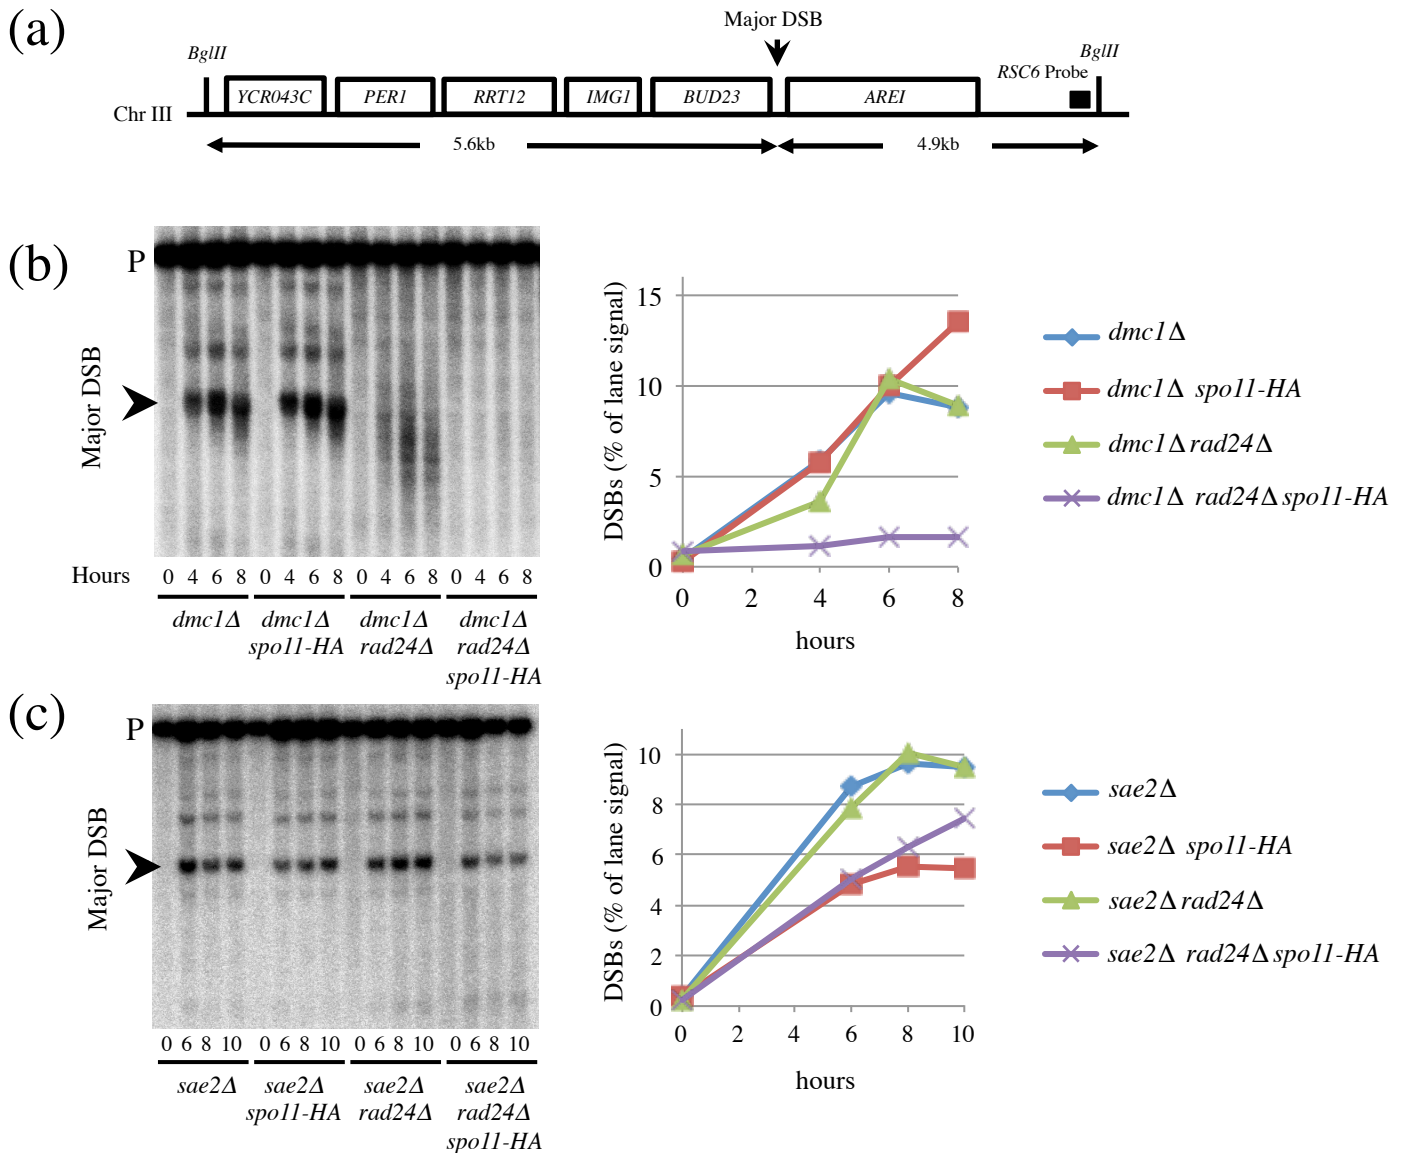

**Figure S1. Analysis of DSB formation at the *ARE1* locus.** a) Physical map of the *ARE1* region including *Bgl*III restriction sites, major DSB site and location of *RSC6* probe. b, c) Genomic DNA was isolated at the indicated timepoints from synchronous cultures of the indicated strains, digested with *Bgl*III, fractionated on a 0.7% agarose gel, transferred to nylon membrane, and hybridised with the *RSC6* probe. Arrowheads indicate DSB signals; P, parental band. Charts are quantification of the major DSB signal plotted as a percentage of total lane signal.

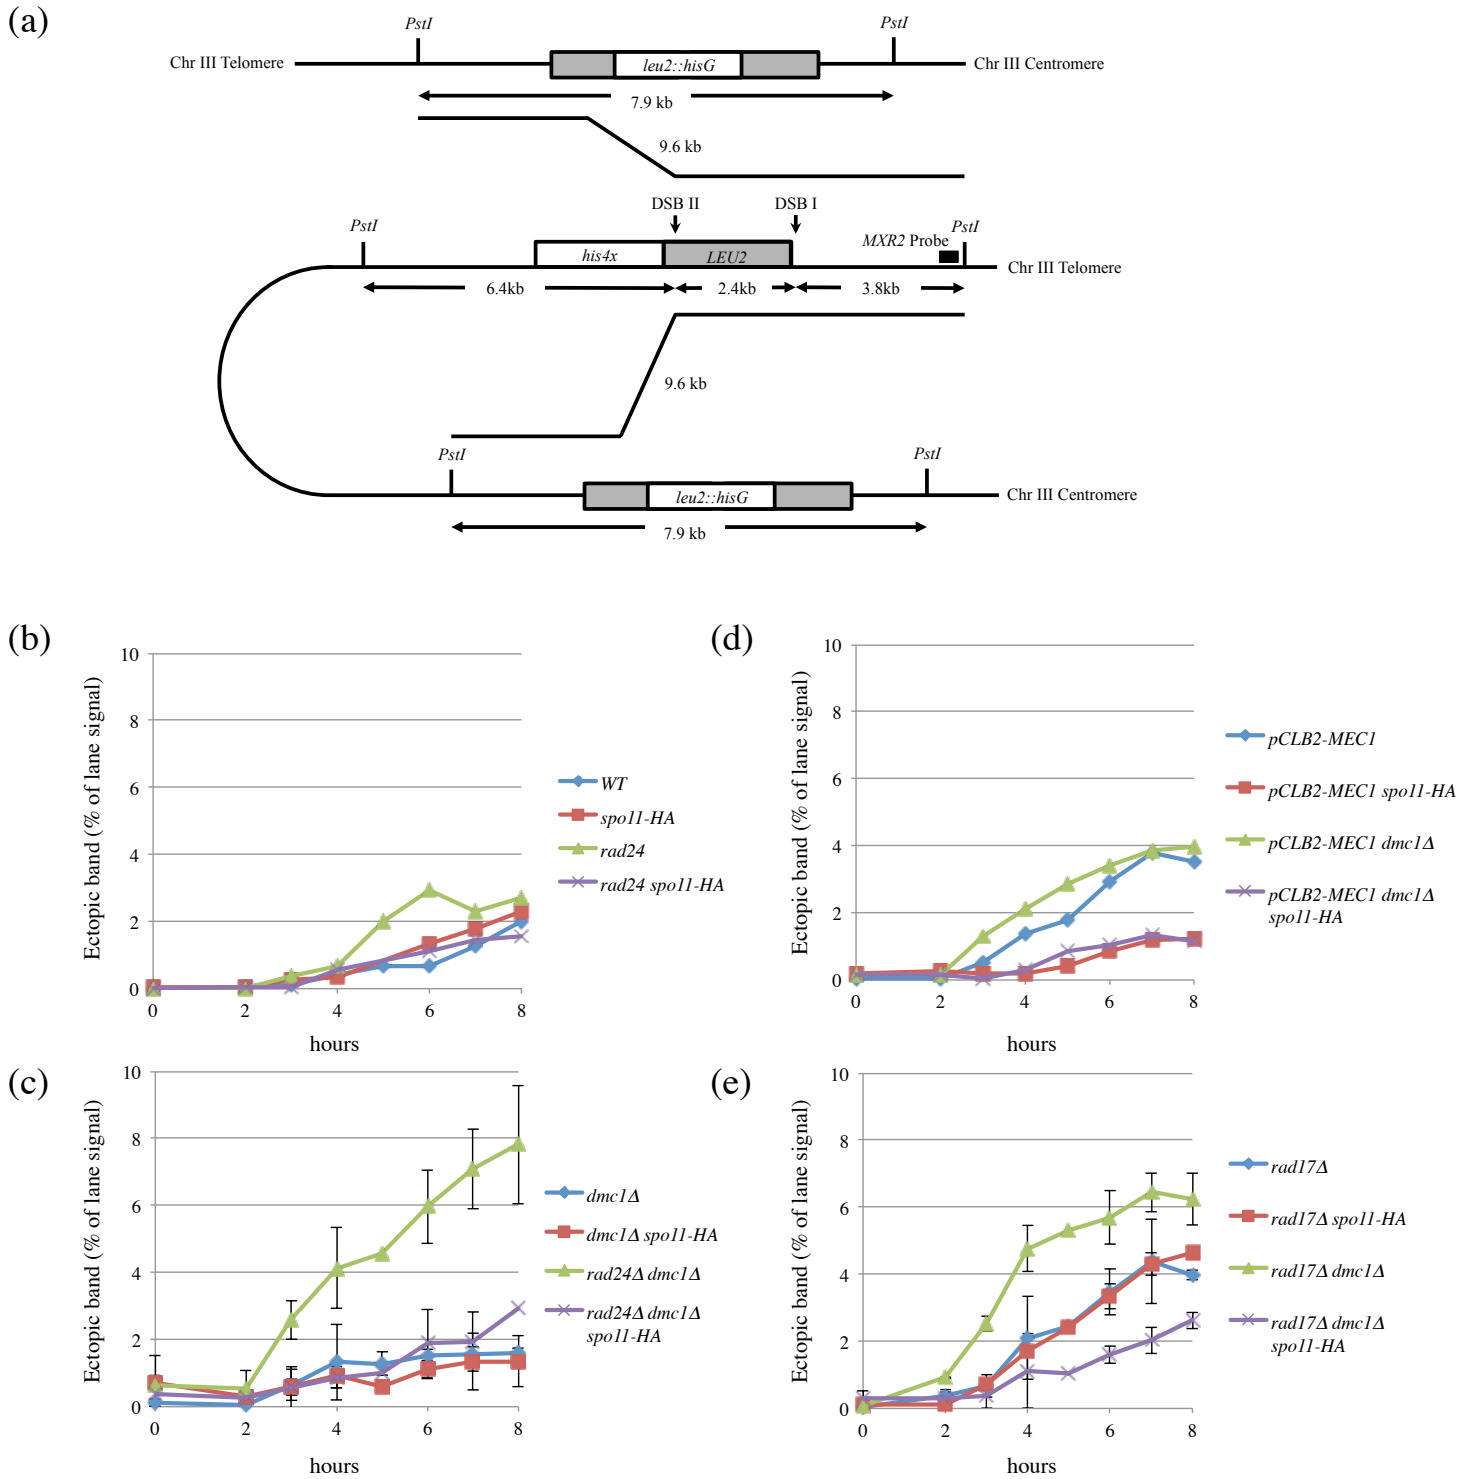

**Figure S2. Quantification of ectopic recombination.** a) Map of interchromatid (upper) and intrachromatid (lower) ectopic recombination events occurring between *HIS4::LEU2* and *leu2::hisG* [41]. b-e) Quantification of the ectopic band indicated in Fig 2b, 2e, 3a, 3c expressed as a percentage of total lane signal.

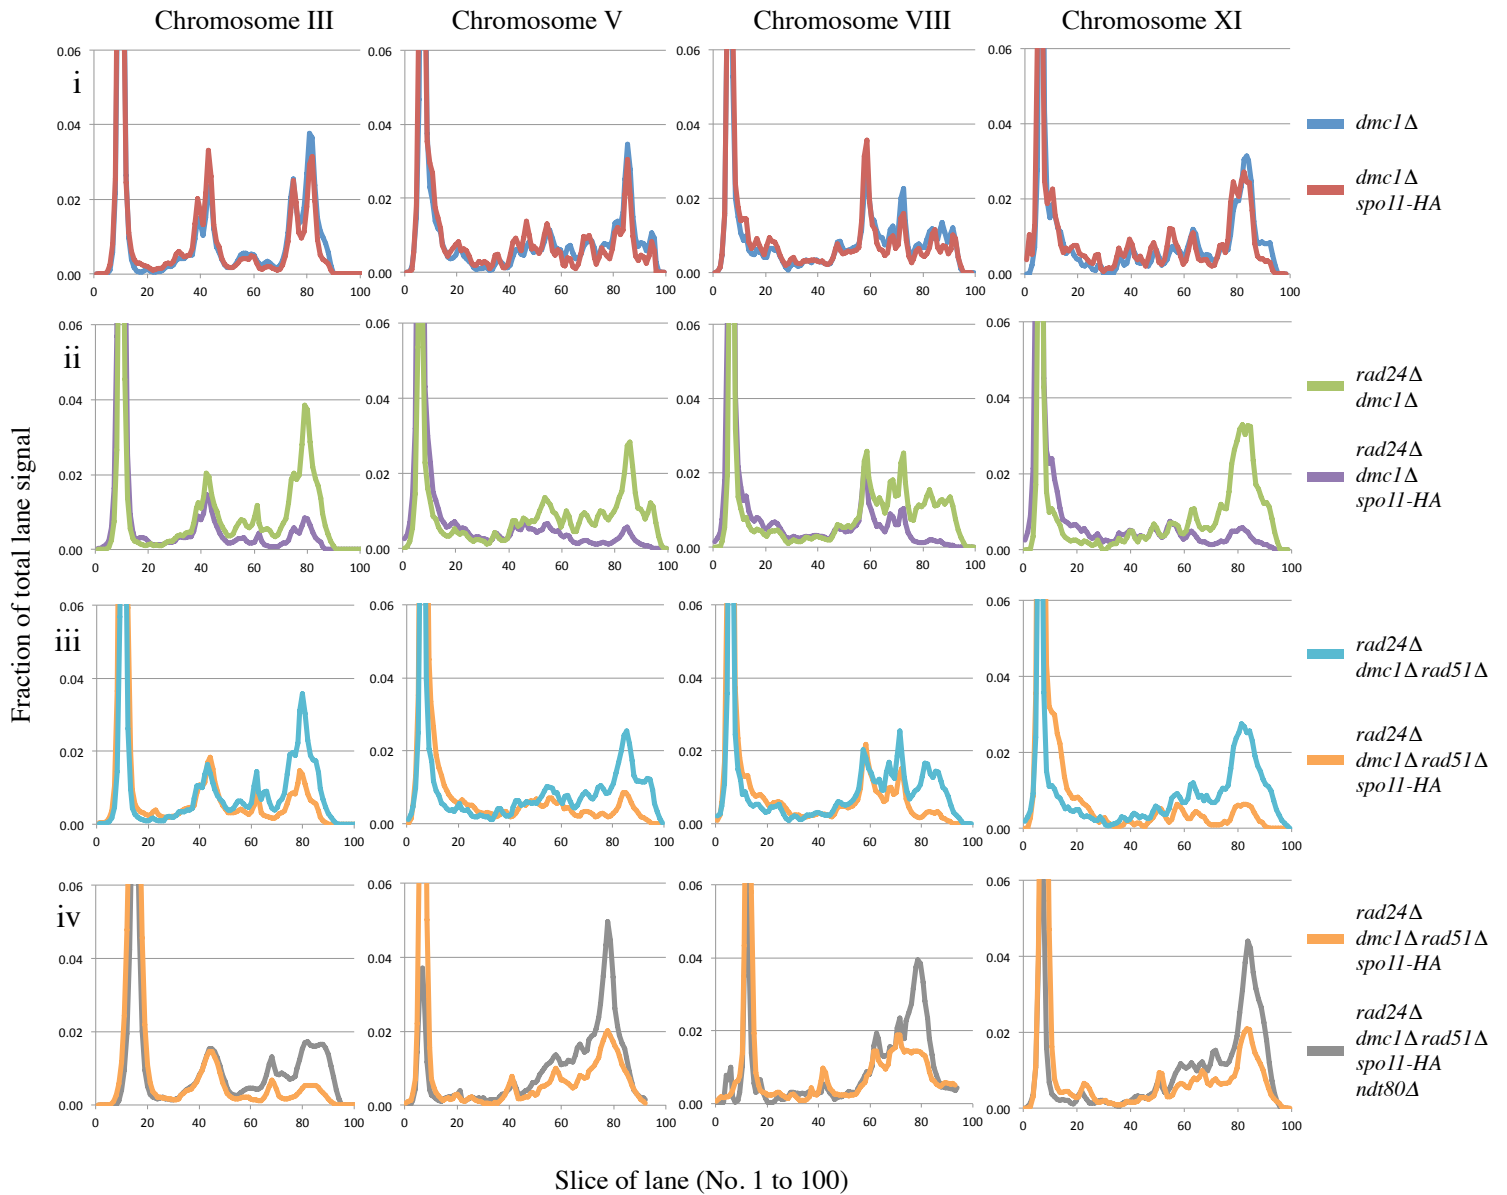

**Figure S3. Comparison lane traces from select PFGE gels.** Representative lane comparisons (panels i-iii and panel iv) for various strains/chromosomes for the gel images shown in Figure 2g and Figure 6c, respectively. Combined lane traces of 6-8 hours were exported from ImageGauge, resampled in Plot (OSX; Ver. 0.997) to create 100 equal lane slices, and displayed on the same scale as a fraction of total lane signal in each slice.

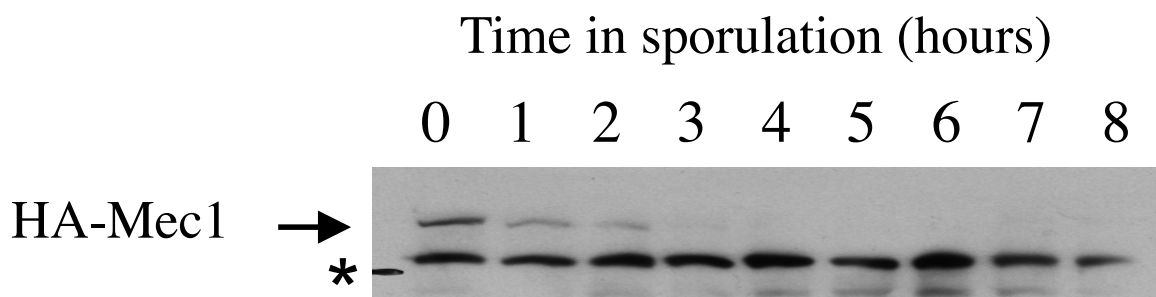

**Figure S4. Replacement of the *MEC1* promoter with the *CLB2* promoter causes rapid loss of Mec1 protein during meiosis.** The *CLB2* promoter was integrated in front of the *MEC1* gene which was N-terminal HA-epitope tagged at the same time. Western analysis using anti-HA antibody was used to detect HA-Mec1 protein throughout 8 hours of meiosis. While clearly present in pre-meiotic cells (0 h time point), the protein was difficult to detect from 3 h of meiosis, indicating that there was no meiotic expression of *MEC1* from the *CLB2* promoter. \* Non-specific band.

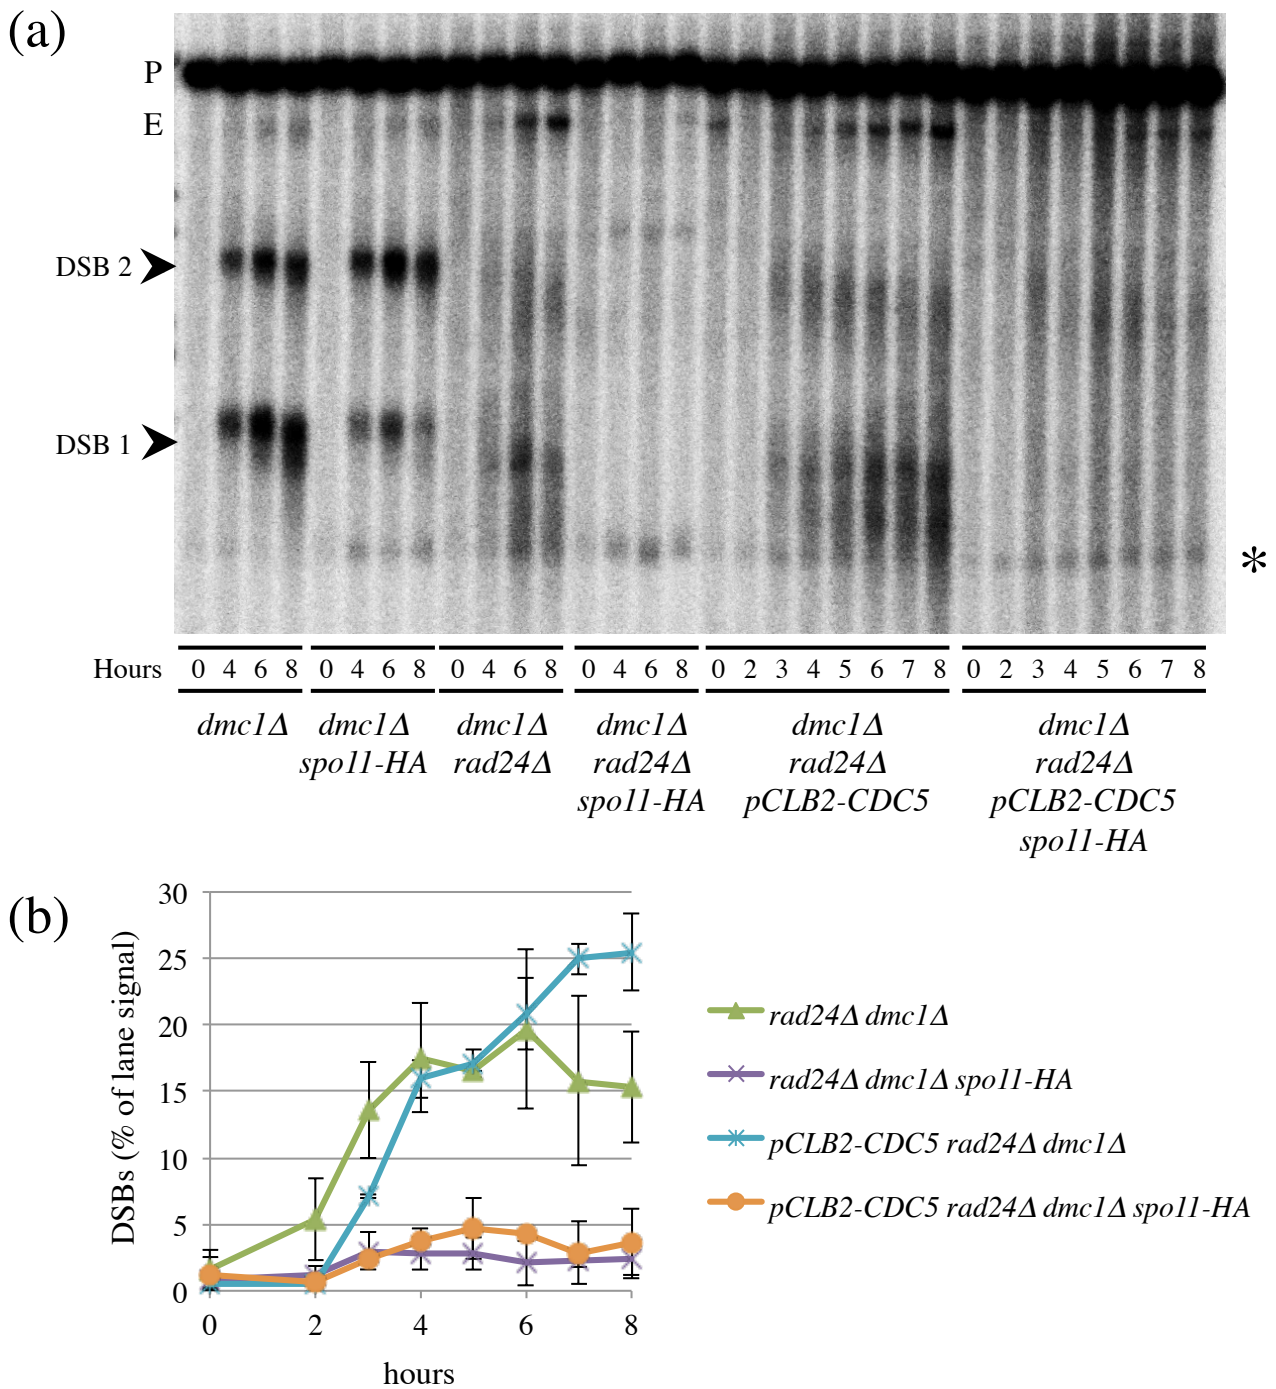

**Figure S5. DSB formation in *rad24Δ dmc1Δ spo11-HA* is not rescued by Cdc5 depletion.**  
 a) Genomic DNA was isolated at the indicated timepoints from synchronous cultures of the indicated strains, digested with *Pst*I, fractionated on a 0.7% agarose gel, transferred to nylon membrane, and hybridised with the *MXR2* probe. Arrowheads indicate DSB signals, asterisk marks nonspecific band; P, parental band, E, ectopic band. b) Quantification of the total DSB signal (DSB 1 + DSB 2) shown in (a) plotted as a percentage of total lane signal. Plotted data are aggregated from multiple experiments.

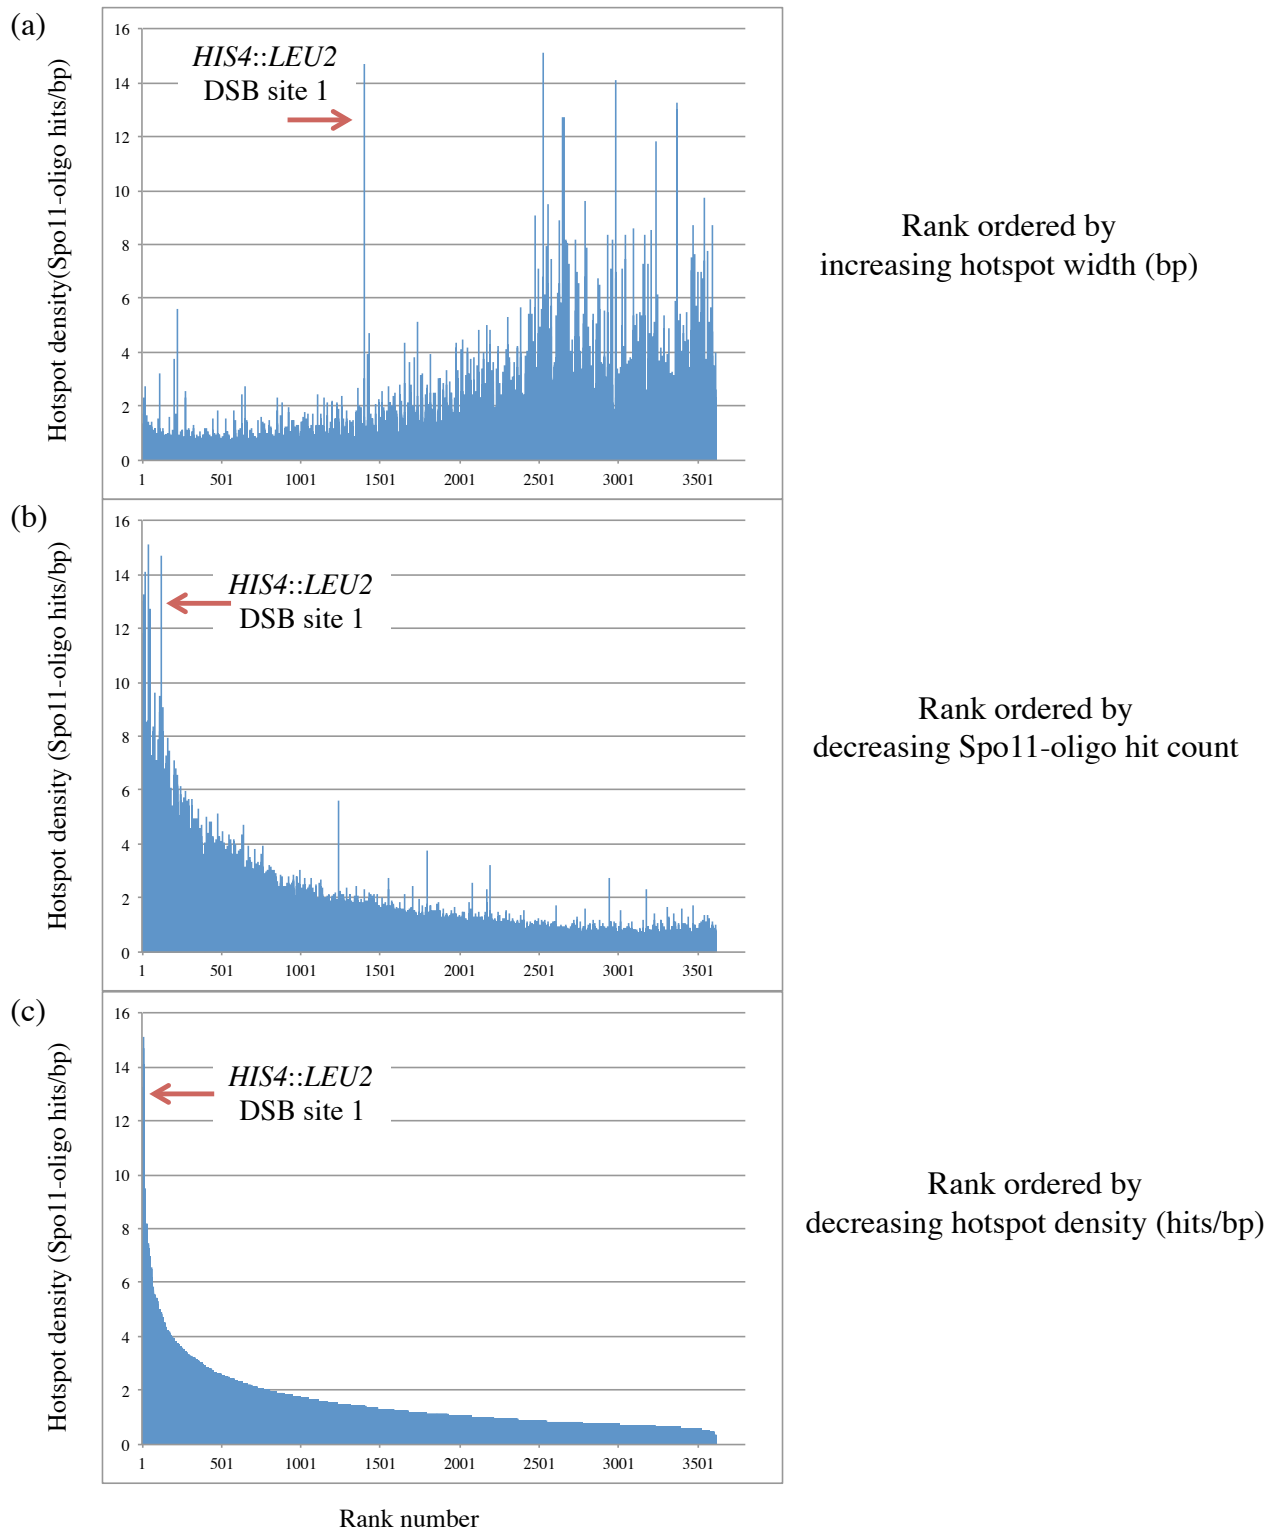

**Figure S6. Analysis of Spo11-oligo hit count density at *HIS4::LEU2* DSB site 1.** Spo11-oligo hit count data was used to calculate the relative density of Spo11-oligos per bp for the ~3600 annotated DSB hotspots [48]. We then rank ordered this data relative to: a) Increasing hotspot width in base pairs; b) Decreasing Spo11-oligo hit count; c) Decreasing hotspot density (hits/bp). The *HIS4::LEU2* DSB site 1 hotspot is indicated with a red arrow. It should be noted that these data are collated from experiments performed with the Spo11-HA3-his6 allele [48], which we show in this manuscript (figure 2b-f) to have a reduced frequency of DSBs at site 1 relative to in an untagged, *SPO11*<sup>+</sup>, strain. It is probable, therefore, that the calculated density of DSBs at *HIS4::LEU2* site 1 is in fact an underestimate of the value that would be measured in wildtype (*SPO11*<sup>+</sup>) cells. However it is also possible that the HA-tag also modulates hotspot width (leading to an associated increase or decrease in measured density). Future comparative analysis of different *SPO11* alleles will be informative to test these ideas further.
